# Supplementary material for: Gibberellins promote nodule organogenesis but inhibit the infection stages of nodulation
Source: PubMed Central journal article supplement (PMC6018947; doi:10.1093/jxb/ery046), 2018-02-08
Supplement: ery046_suppl_supplementary_figures_and_tables.pdf [file ery046_suppl_supplementary_figures_and_tables.pdf]

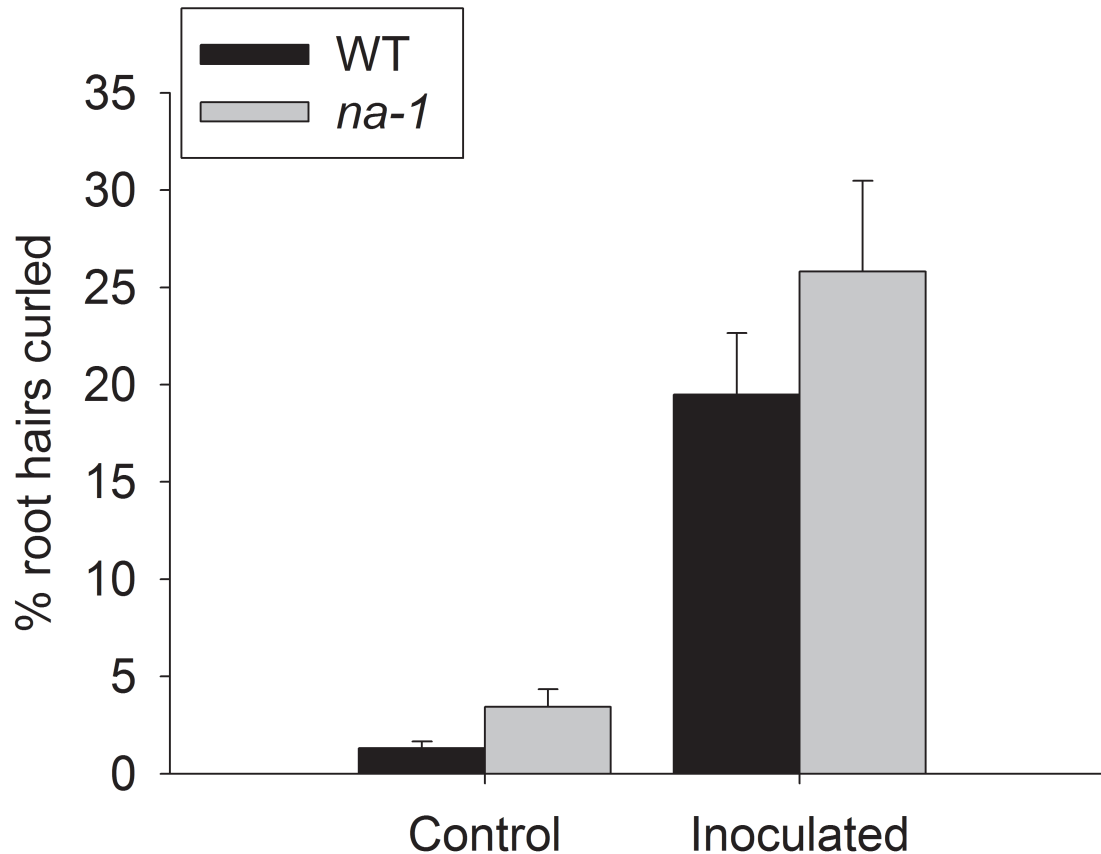

**Supplementary Figure 1. Root hair curling in wild type (WT) and *na-1* after inoculation with *Rhizobium leguminosarum* bv. *viciae*.** Percentage of root hairs curled 10 d after treatment with rhizobium (inoculated) compared with a solvent control (control) (n=12-16) and analysis by ANOVA indicated no significant differences between *na-1* and its WT progenitor.

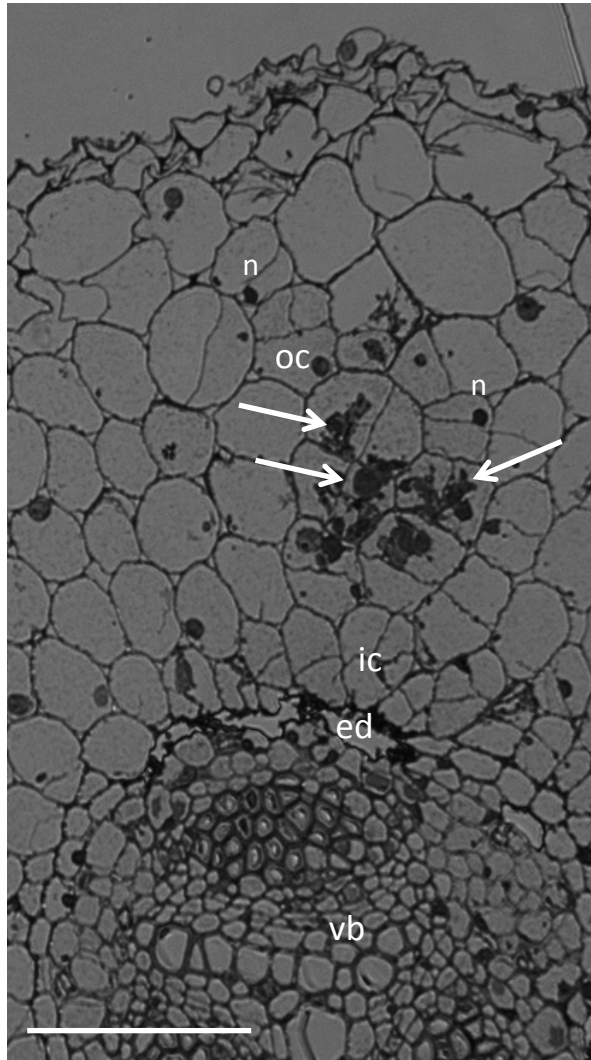

**Supplementary Figure 2. A cross section of a *na* root containing a bacterial accumulation (white arrows), nuclei (n), outer cortex (oc), inner cortex (ic), endodermis (ed) and vascular bundle (vb) 5 weeks after inoculation with *Rhizobium leguminosarum* bv. *viciae*. Scale bar is 100  $\mu$ m.**

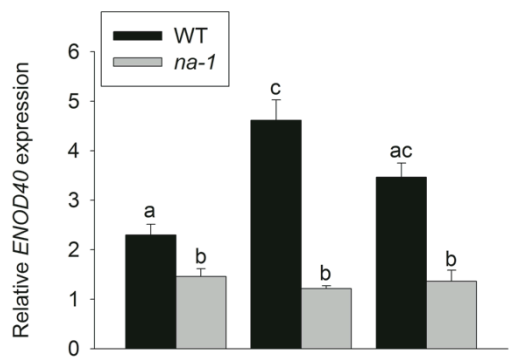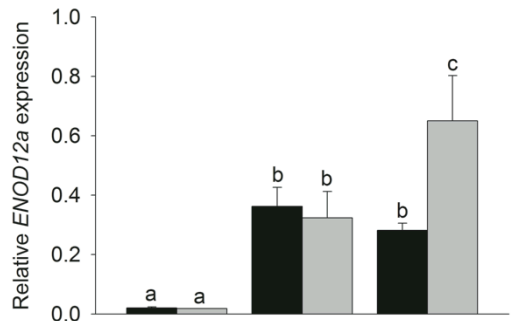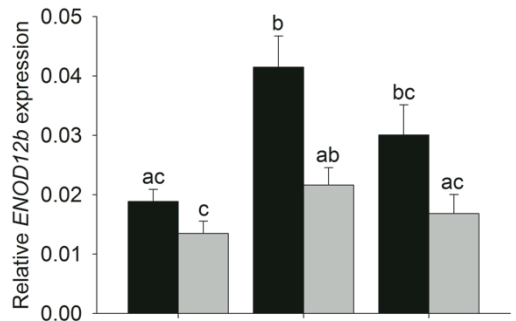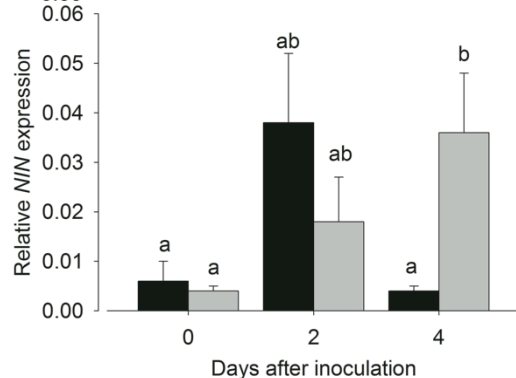

**Supplemental Figure 3. The expression of early nodulation (*ENOD*) genes and *NIN* in wild type (WT) and *na-1* plants 0, 2 and 4 d following inoculation with *Rhizobium leguminosarum* bv. *viciae*.** Relative expression of *ENOD40*, *ENOD12a*, *ENOD12b* and *NIN*. Values are mean  $\pm$  s.e. (n=3-4). Values with different letters are significantly different (P<0.05).

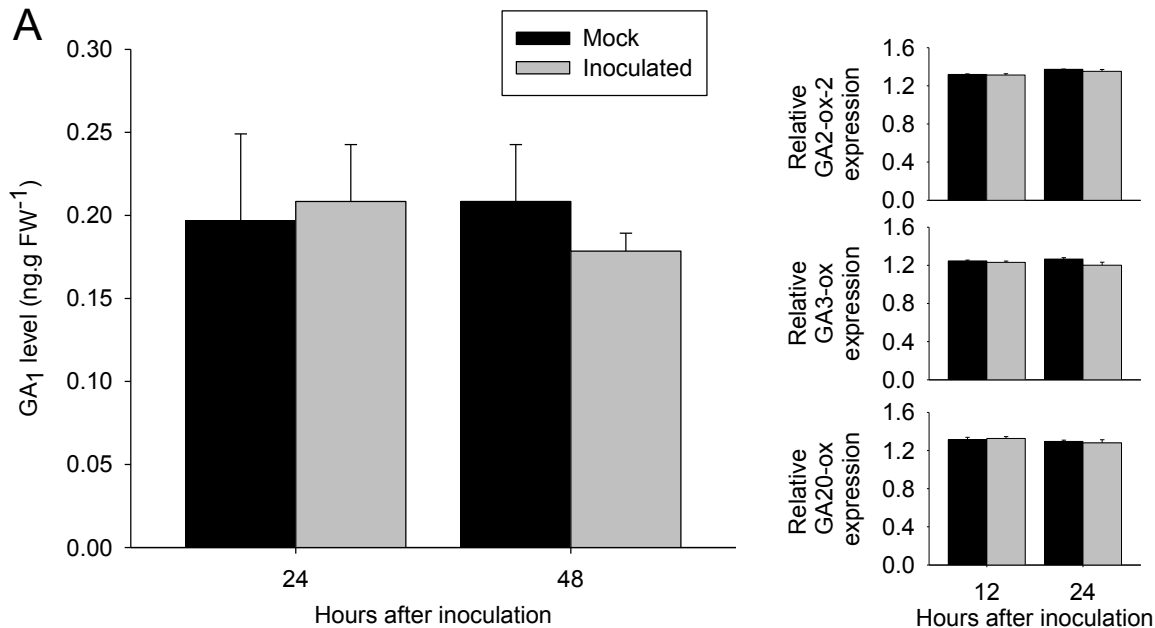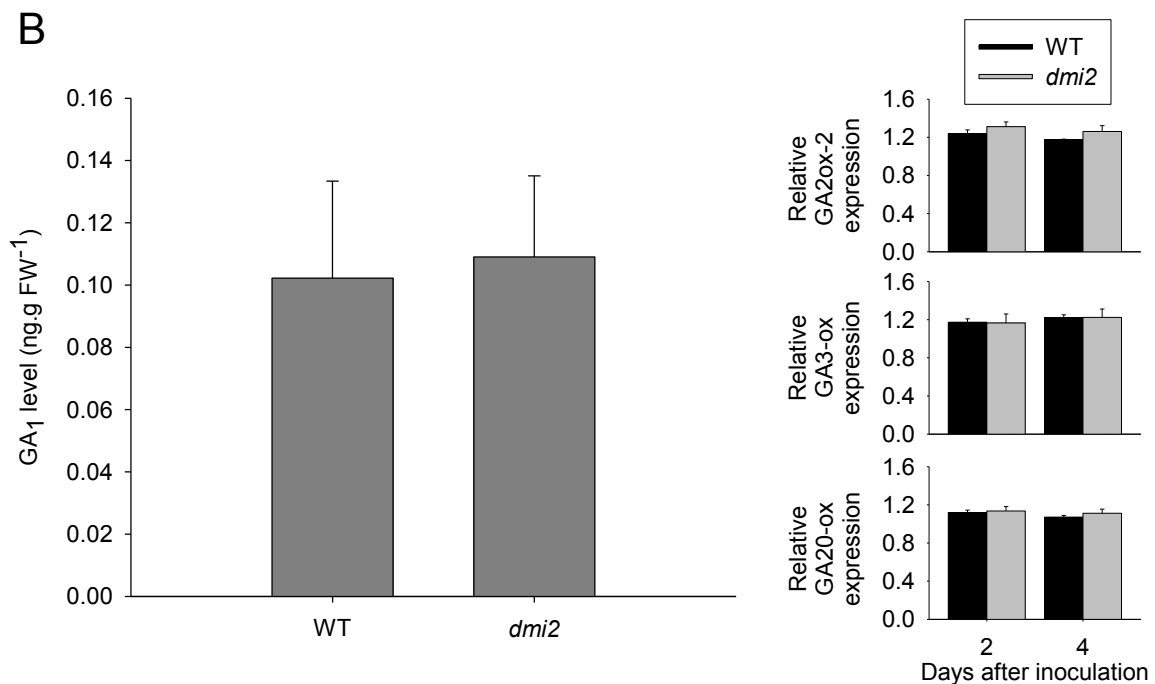

**Supplementary Figure 4.**  
**Gibberellin (GA) levels and expression of GA metabolism genes in root tips of wild type (WT) and symbiosis mutant *dmi2* plants after inoculation with *Rhizobium leguminosarum* bv. *viciae*.**

(A) Levels of the bioactive GA<sub>1</sub> and relative expression of GA genes *GA2-ox-2*, *GA3-ox* and *GA20-ox* in root tips of WT pea plants in hours and days after treatment (inoculated) or with a solvent control (mock) (n=3-5). (B) WT and *dmi2* mutants, GA<sub>1</sub> in root tip (n=4) 12 d after inoculation and relative expression of GA genes 2 and 4 d after inoculation (n=3). Values are mean ± s.e. and analysis of each experiment by ANOVA or t-test indicated no significant differences.

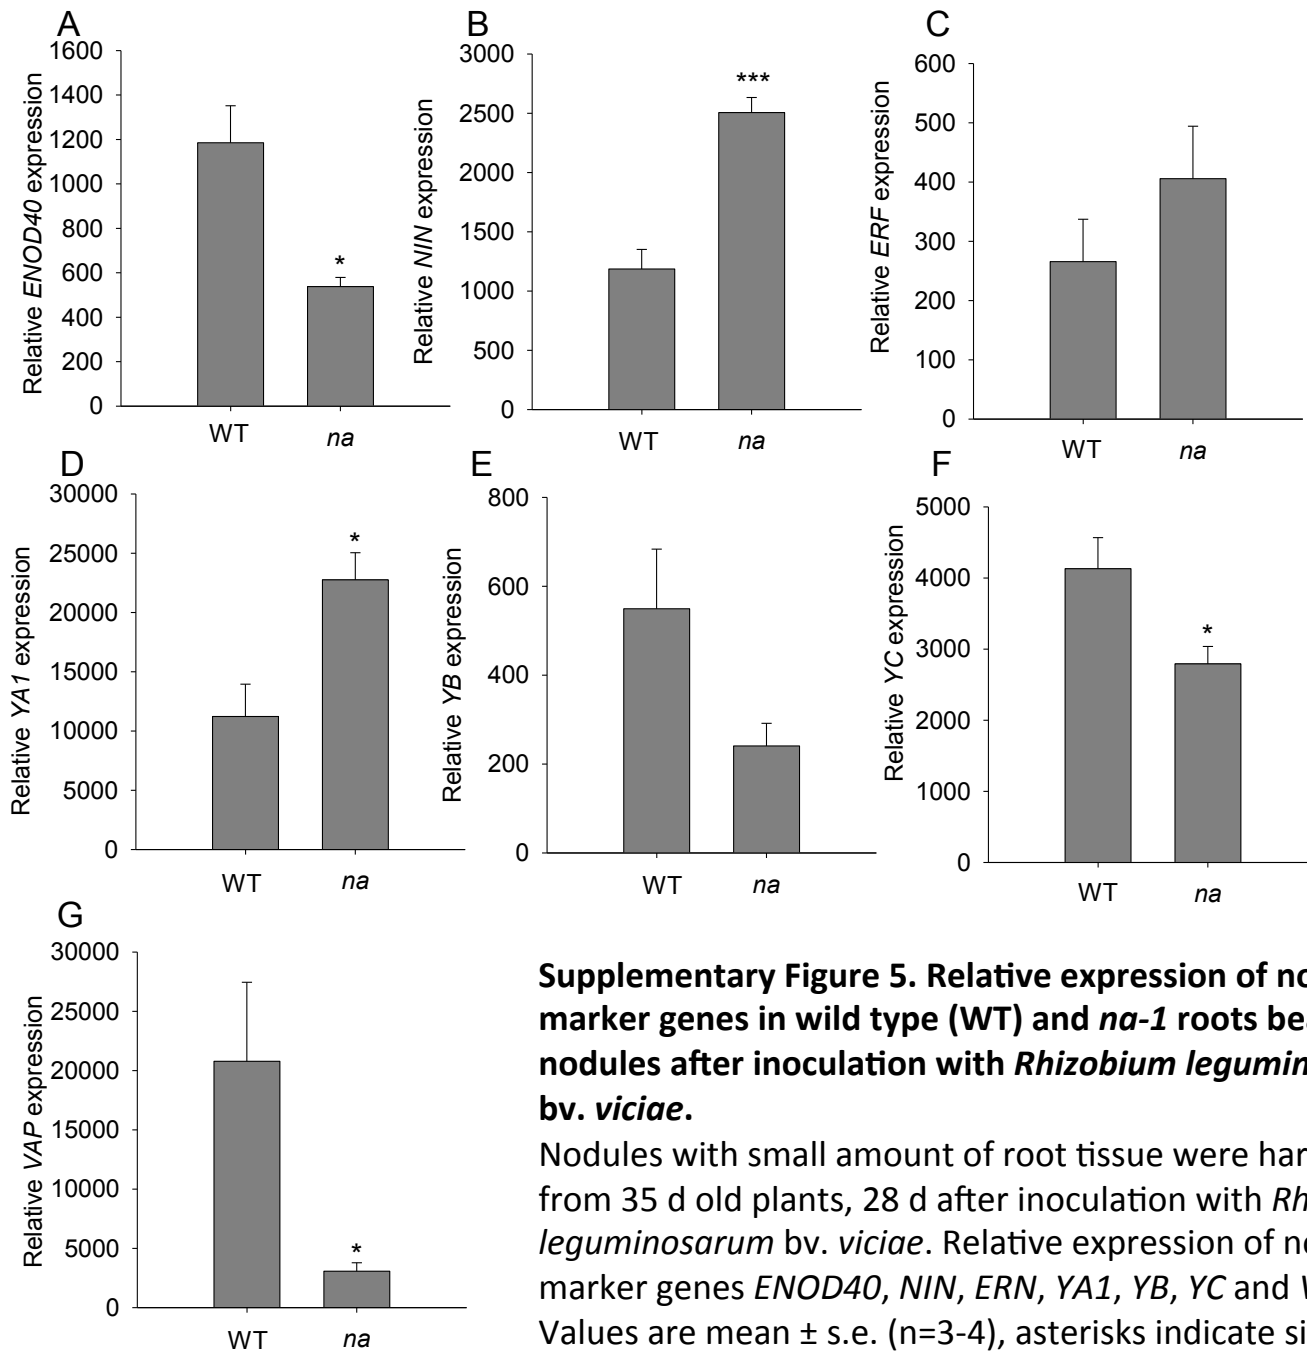

**Supplementary Figure 5. Relative expression of nodule marker genes in wild type (WT) and *na-1* roots bearing nodules after inoculation with *Rhizobium leguminosarum* bv. *viciae*.**

Nodules with small amount of root tissue were harvested from 35 d old plants, 28 d after inoculation with *Rhizobium leguminosarum* bv. *viciae*. Relative expression of nodule marker genes *ENOD40*, *NIN*, *ERN*, *YA1*, *YB*, *YC* and *VAP*. Values are mean  $\pm$  s.e. (n=3-4), asterisks indicate significant difference from WT (\*P<0.05, \*\*\*P<0.001).

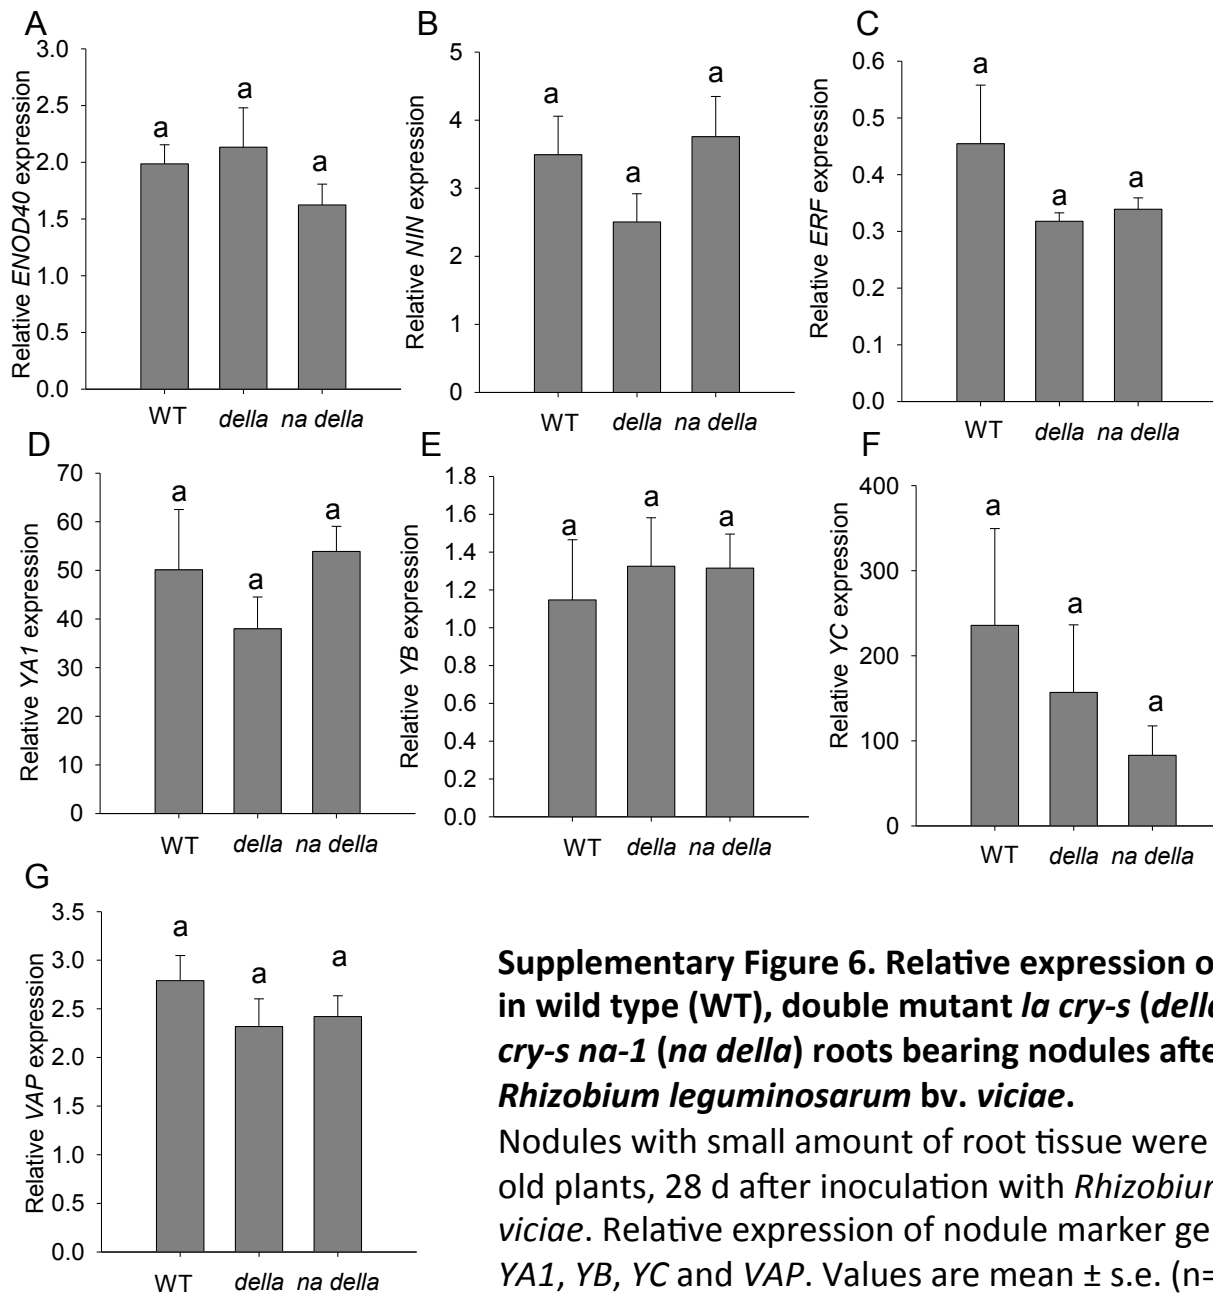

**Supplementary Figure 6. Relative expression of nodule marker genes in wild type (WT), double mutant *la cry-s (della)* and triple mutant *la cry-s na-1 (na della)* roots bearing nodules after inoculation with *Rhizobium leguminosarum* bv. *viciae*.**

Nodules with small amount of root tissue were harvested from 35 d old plants, 28 d after inoculation with *Rhizobium leguminosarum* bv. *viciae*. Relative expression of nodule marker genes *ENOD40*, *NIN*, *ERN*, *YA1*, *YB*, *YC* and *VAP*. Values are mean  $\pm$  s.e. (n=3-4), ANOVAs were performed and no significant differences were found.

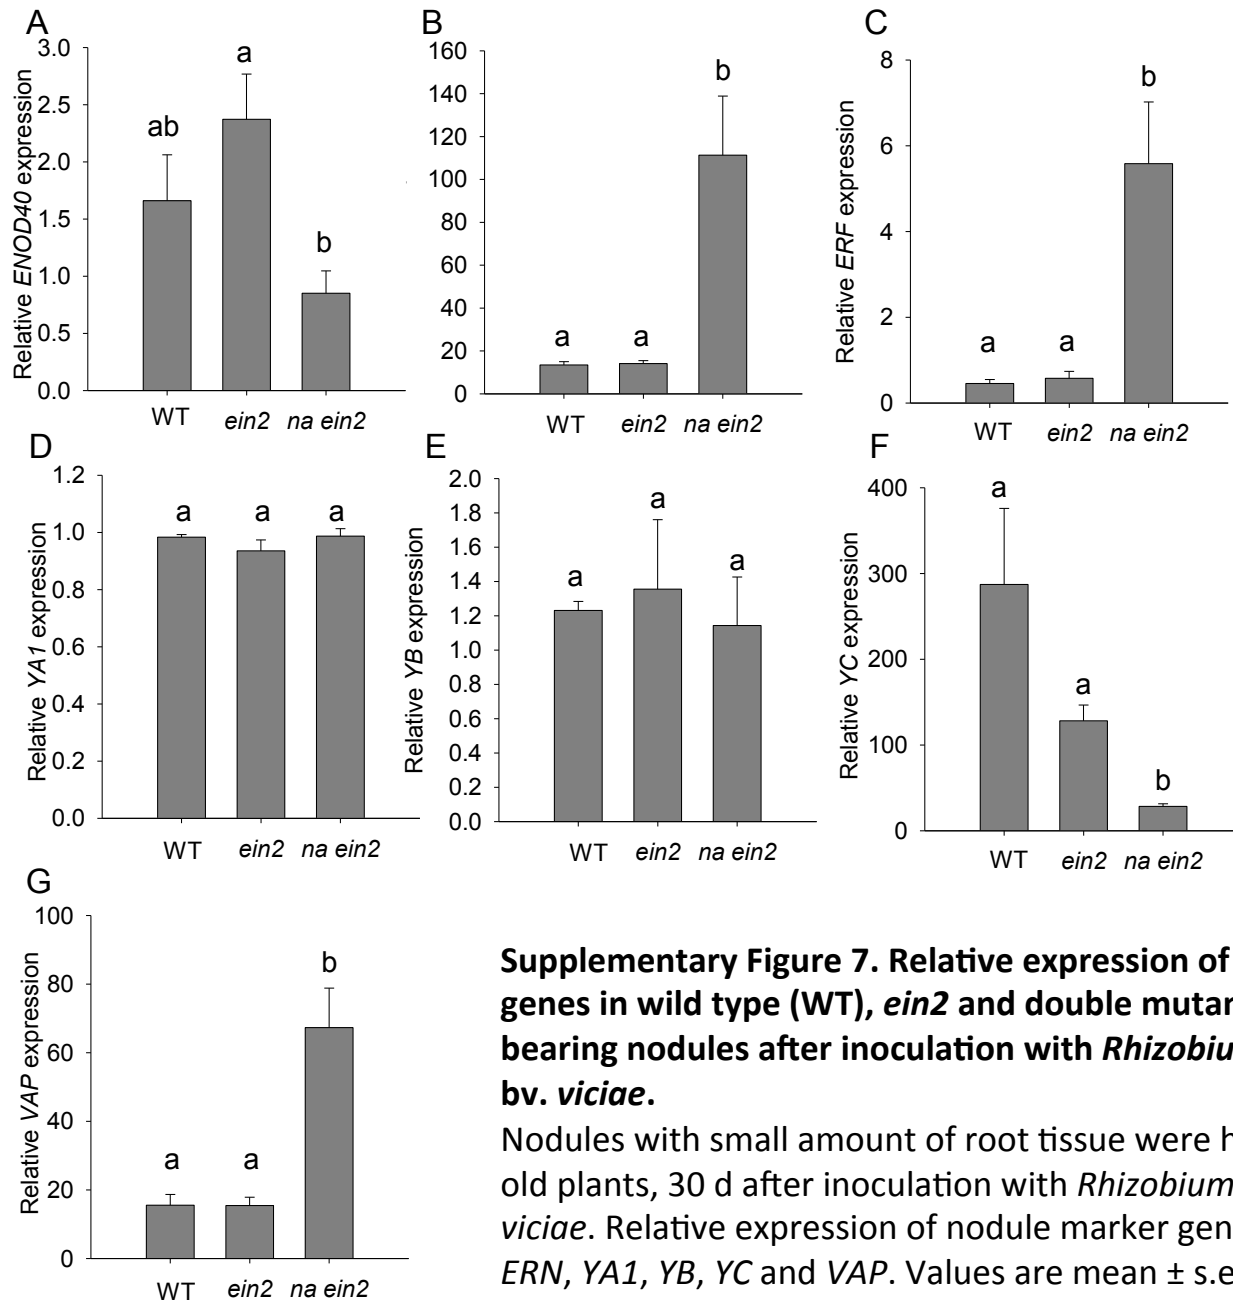

**Supplementary Figure 7. Relative expression of nodule marker genes in wild type (WT), *ein2* and double mutant *na-1 ein2* roots bearing nodules after inoculation with *Rhizobium leguminosarum* bv. *viciae*.**

Nodules with small amount of root tissue were harvested from 37 d old plants, 30 d after inoculation with *Rhizobium leguminosarum* bv. *viciae*. Relative expression of nodule marker genes *ENOD40*, *NIN*, *ERN*, *YA1*, *YB*, *YC* and *VAP*. Values are mean  $\pm$  s.e. (n=3-4), values with different letters are significantly different (P<0.05).

Supplementary Table 1. Primer pairs used in this study.

| Gene name        | F primer                    | R primer                       |
|------------------|-----------------------------|--------------------------------|
| <i>PsERN</i>     | 5'-TCTCTTTCGAGCGAGGCTAC-3'  | 5'-AGCTAGACGCGTCGATCATT-3'     |
| <i>PsENOD12b</i> | 5'-TGAACCACCAGTGAATGAGC-3'  | 5'-TGGATGTTATGTTCCGCTGT-3'     |
| <i>PsYAI</i>     | 5'-ATGTCGGTTGATGCACAAAA-3'  | 5'-ACGAAGTTGGTCCGTCGTC-3'      |
| <i>PsYB</i>      | 5'-GGCATTAAAGGAGCAAGATCG-3' | 5'-TGCCTCACTTGTCACAAAGC-3'     |
| <i>PsYC</i>      | 5'-GTGGAGGTCAAATGCCGTAT-3'  | 5'-TGGACTGTTGCTGAAGTTG-3'      |
| <i>PsNIN</i>     | 5'-GGTGGTGGATGCAGTGTTTC-3'  | 5'-GAATGCTGTAATGTCGATTGCG-3'   |
| <i>PsVAP</i>     | 5'-CTCCAGGTGCAGCTATCAAA-3'  | 5'-CAAGCACTTCTCTTATGTCATCCA-3' |
| <i>PsTF11a</i>   | 5'-TCTTCCCGTCCTTCCACATAA-3' | 5'-GCAACCTCCTTCTCCTTGGAT-3'    |



**Supplementary Table 2.** Nodule number per g DW root and average individual nodule size (DW mg) in wild type plants treated with various doses of the gibberellin biosynthesis inhibitor, paclobutrazol (PAC) 4 weeks after inoculation with *Rhizobium leguminosarum* bv. *viciae*. Values are mean  $\pm$  s.e. (n=5-6) and values with different letters are significantly different (P<0.05), n.m. is not measurable.

| Treatment        | Nodule number per g root DW | Individual nodule DW  |
|------------------|-----------------------------|-----------------------|
| Control          | 1022.2 $\pm$ 98.7 a         | 0.0865 $\pm$ 0.0110 a |
| + 1 $\mu$ g PAC  | 928.5 $\pm$ 129.6 a         | 0.0998 $\pm$ 0.0129 a |
| + 3 $\mu$ g PAC  | 1161.9 $\pm$ 224.4 a        | 0.1100 $\pm$ 0.0392 a |
| + 10 $\mu$ g PAC | 1692.2 $\pm$ 267.6 a        | 0.0349 $\pm$ 0.0119 b |
| + 30 $\mu$ g PAC | 589.4 $\pm$ 65.8 b          | n.m.                  |
